# Supplementary material for: The Comorbidity Burden of Hidradenitis Suppurativa in the United States: A Claims Data Analysis
Source: PubMed Central journal article supplement — Dermatol Ther (Heidelb). 2018 Oct 10;8(4):557–69. doi: 10.1007/s13555-018-0264-z (PMC6261111; doi:10.1007/s13555-018-0264-z), 2018-10-10
Supplement: 13555_2018_264_MOESM1_ESM.pdf [file 13555_2018_264_MOESM1_ESM.pdf]

## **SUPPORTING INFORMATION**

### **The Comorbidity Burden of Hidradenitis Suppurativa in the United States: a Claims Data Analysis**

**Supplementary Table 1: HS-related comorbidities**

| HS-related comorbid conditions                                   | Matched patients and controls |                          |                            |                          | Comparisons            |                        |                        |
|------------------------------------------------------------------|-------------------------------|--------------------------|----------------------------|--------------------------|------------------------|------------------------|------------------------|
|                                                                  | HS-mild [A]<br>N = 2,292      | HS-free [B]<br>N = 2,292 | HS-severe [C]<br>N = 3,065 | HS-free [D]<br>N = 3,065 | P-value<br>[A] vs. [B] | P-value<br>[C] vs. [D] | P-value<br>[A] vs. [C] |
| <b>Any HS-related comorbid condition, N (%)</b>                  | <b>1,790 (78.1)</b>           | <b>1,064 (46.4)</b>      | <b>2,653 (86.6)</b>        | <b>1,473 (48.1)</b>      | <b>&lt;0.0001*</b>     | <b>&lt;0.0001*</b>     | <b>&lt;0.0001*</b>     |
| <b>Follicular Occlusion Conditions, N (%)</b>                    | <b>628 (27.4)</b>             | <b>147 (6.4)</b>         | <b>1,374 (44.8)</b>        | <b>166 (5.4)</b>         | <b>&lt;0.0001*</b>     | <b>&lt;0.0001*</b>     | <b>&lt;0.0001*</b>     |
| Acne conglobata and other acne                                   | 262 (11.4)                    | 87 (3.8)                 | 398 (13.0)                 | 103 (3.4)                | <0.0001*               | <0.0001*               | 0.0868                 |
| Sebaceous cyst                                                   | 248 (10.8)                    | 52 (2.3)                 | 903 (29.5)                 | 56 (1.8)                 | <0.0001*               | <0.0001*               | <0.0001*               |
| Dissecting cellulitis of the scalp                               | 218 (9.5)                     | 17 (0.7)                 | 277 (9.0)                  | 20 (0.7)                 | <0.0001*               | <0.0001*               | 0.5535                 |
| Pilonidal cyst                                                   | 19 (0.8)                      | 2 (0.1)                  | 106 (3.5)                  | 4 (0.1)                  | 0.0002*                | <0.0001*               | <0.0001*               |
| <b>Inflammatory Conditions, N (%)</b>                            | <b>261 (11.4)</b>             | <b>139 (6.1)</b>         | <b>457 (14.9)</b>          | <b>193 (6.3)</b>         | <b>&lt;0.0001*</b>     | <b>&lt;0.0001*</b>     | <b>&lt;0.0001*</b>     |
| Rheumatoid arthritis/collagen vascular diseases                  | 89 (3.9)                      | 46 (2.0)                 | 166 (5.4)                  | 54 (1.8)                 | <0.0001*               | <0.0001*               | 0.0091                 |
| Synovitis <sup>1</sup>                                           | 71 (3.1)                      | 36 (1.6)                 | 100 (3.3)                  | 59 (1.9)                 | 0.0007                 | 0.0008                 | 0.7341                 |
| Psoriasis                                                        | 47 (2.1)                      | 14 (0.6)                 | 67 (2.2)                   | 26 (0.8)                 | <0.0001*               | <0.0001*               | 0.7341                 |
| Irritable bowel syndrome                                         | 41 (1.8)                      | 35 (1.5)                 | 68 (2.2)                   | 44 (1.4)                 | 0.4855                 | 0.0221                 | 0.2703                 |
| Crohn disease                                                    | 18 (0.8)                      | 6 (0.3)                  | 43 (1.4)                   | 9 (0.3)                  | 0.0143                 | <0.0001*               | 0.0350                 |
| Pyoderma                                                         | 12 (0.5)                      | 2 (0.1)                  | 38 (1.2)                   | 3 (0.1)                  | 0.0075                 | <0.0001*               | 0.0070                 |
| Ulcerative colitis                                               | 10 (0.4)                      | 8 (0.3)                  | 29 (0.9)                   | 13 (0.4)                 | 0.6171                 | 0.0136                 | 0.0299                 |
| Sicca syndrome (incl. Sjogren disease)                           | 6 (0.3)                       | 1 (0.0)                  | 6 (0.2)                    | 6 (0.2)                  | 0.0588                 | 1.0000                 | 0.6131                 |
| Psoriatic arthritis                                              | 5 (0.2)                       | 3 (0.1)                  | 11 (0.4)                   | 3 (0.1)                  | 0.4795                 | 0.0325                 | 0.3503                 |
| Arthropathies                                                    | 2 (0.1)                       | 1 (0.0)                  | 10 (0.3)                   | 2 (0.1)                  | 0.5637                 | 0.0209                 | 0.0671                 |
| Pityriasis rubra pilaris                                         | 0 (0.0)                       | 0 (0.0)                  | 0 (0.0)                    | 0 (0.0)                  | -                      | -                      | -                      |
| <b>Endocrine/Metabolic and Hormone-related Conditions, N (%)</b> | <b>1,235 (53.9)</b>           | <b>746 (32.5)</b>        | <b>1,801 (58.8)</b>        | <b>1,001 (32.7)</b>      | <b>&lt;0.0001*</b>     | <b>&lt;0.0001*</b>     | <b>0.0004</b>          |
| Dyslipidemia                                                     | 661 (28.8)                    | 395 (17.2)               | 942 (30.7)                 | 573 (18.7)               | <0.0001*               | <0.0001*               | 0.1341                 |
| Hypertension                                                     | 644 (28.1)                    | 397 (17.3)               | 1,025 (33.4)               | 533 (17.4)               | <0.0001*               | <0.0001*               | <0.0001*               |
| Diabetes                                                         | 299 (13.0)                    | 140 (6.1)                | 590 (19.2)                 | 184 (6.0)                | <0.0001*               | <0.0001*               | <0.0001*               |
| Thyroid disease                                                  | 275 (12.0)                    | 197 (8.6)                | 368 (12.0)                 | 240 (7.8)                | <0.0001*               | <0.0001*               | 0.9926                 |
| Obesity                                                          | 247 (10.8)                    | 68 (3.0)                 | 346 (11.3)                 | 81 (2.6)                 | <0.0001*               | <0.0001*               | 0.5545                 |
| PCOS                                                             | 33 (1.4)                      | 8 (0.3)                  | 60 (2.0)                   | 19 (0.6)                 | <0.0001*               | <0.0001*               | 0.1511                 |
| Other selected conditions <sup>2</sup>                           | 14 (0.6)                      | 2 (0.1)                  | 19 (0.6)                   | 3 (0.1)                  | 0.0027                 | 0.0006                 | 0.9665                 |
| <b>Malignant neoplasms, N (%)</b>                                | <b>140 (6.1)</b>              | <b>93 (4.1)</b>          | <b>196 (6.4)</b>           | <b>116 (3.8)</b>         | <b>0.0009</b>          | <b>&lt;0.0001*</b>     | <b>0.6686</b>          |
| Malignant neoplasm of skin                                       | 44 (1.9)                      | 31 (1.4)                 | 54 (1.8)                   | 50 (1.6)                 | 0.1281                 | 0.6892                 | 0.6696                 |
| Malignant neoplasm other than skin                               | 94 (4.1)                      | 61 (2.7)                 | 141 (4.6)                  | 65 (2.1)                 | 0.0077                 | <0.0001*               | 0.3775                 |
| <b>Other Conditions, N (%)</b>                                   |                               |                          |                            |                          |                        |                        |                        |
| Depression                                                       | 275 (12.0)                    | 168 (7.3)                | 442 (14.4)                 | 221 (7.2)                | <0.0001*               | <0.0001*               | 0.0100                 |
| Anxiety disorders                                                | 195 (8.5)                     | 116 (5.1)                | 283 (9.2)                  | 182 (5.9)                | <0.0001*               | <0.0001*               | 0.3568                 |
| Deficiency anemias                                               | 183 (8.0)                     | 104 (4.5)                | 339 (11.1)                 | 136 (4.4)                | <0.0001*               | <0.0001*               | <0.0001*               |
| Asthma                                                           | 179 (7.8)                     | 103 (4.5)                | 301 (9.8)                  | 146 (4.8)                | <0.0001*               | <0.0001*               | 0.0108                 |
| Herpes simplex                                                   | 51 (2.2)                      | 14 (0.6)                 | 80 (2.6)                   | 30 (1.0)                 | <0.0001*               | <0.0001*               | 0.3667                 |
| Kidney disease                                                   | 34 (1.5)                      | 22 (1.0)                 | 96 (3.1)                   | 16 (0.5)                 | 0.1025                 | <0.0001*               | <0.0001*               |
| Down syndrome                                                    | 13 (0.6)                      | 0 (0.0)                  | 5 (0.2)                    | 0 (0.0)                  | -                      | -                      | 0.0115                 |
| Ichthyosis congenita/Keratitichthyosis-deafness (KID) syndrome   | 2 (0.1)                       | 0 (0.0)                  | 0 (0.0)                    | 1 (0.0)                  | -                      | -                      | 0.1019                 |

HS: Hidradenitis suppurativa

Notes:

[1] The ICD-9 code for synovitis (727.0) includes synovitis and tenosynovitis.

[2] Other selected conditions included acanthosis nigricans, acromegaly, and Cushing disease

\* Significant at the 5% level after Bonferroni correction

**Supplementary Table 2: Other physical and mental comorbidities**

|                                                                               | Matched patients and controls |                  |                  |                  | Comparisons        |                    |                    |
|-------------------------------------------------------------------------------|-------------------------------|------------------|------------------|------------------|--------------------|--------------------|--------------------|
|                                                                               | HS-mild [A]                   | HS-free [B]      | HS-severe [C]    | HS-free [D]      | P-value            | P-value            | P-value            |
| <b>Other physical and mental comorbid conditions, N (%)</b>                   | <b>N = 2,292</b>              | <b>N = 2,292</b> | <b>N = 3,065</b> | <b>N = 3,065</b> | <b>[A] vs. [B]</b> | <b>[C] vs. [D]</b> | <b>[A] vs. [C]</b> |
| Chronic pulmonary disease                                                     | 311 (13.6)                    | 172 (7.5)        | 522 (17.0)       | 221 (7.2)        | <0.0001*           | <0.0001*           | 0.0005             |
| Sleep-wake disorders                                                          | 198 (8.6)                     | 78 (3.4)         | 340 (11.1)       | 140 (4.6)        | <0.0001*           | <0.0001*           | 0.0031             |
| Psychoses                                                                     | 163 (7.1)                     | 101 (4.4)        | 292 (9.5)        | 140 (4.6)        | <0.0001*           | <0.0001*           | 0.0017             |
| Substance-related and addictive disorders                                     | 146 (6.4)                     | 43 (1.9)         | 332 (10.8)       | 60 (2.0)         | <0.0001*           | <0.0001*           | <0.0001*           |
| Trauma- and stressor-related disorders                                        | 113 (4.9)                     | 70 (3.1)         | 166 (5.4)        | 104 (3.4)        | 0.0013             | <0.0001*           | 0.4285             |
| Fluid and electrolyte disorders                                               | 90 (3.9)                      | 49 (2.1)         | 155 (5.1)        | 67 (2.2)         | 0.0004             | <0.0001*           | 0.0501             |
| Valvular disease                                                              | 87 (3.8)                      | 44 (1.9)         | 127 (4.1)        | 53 (1.7)         | <0.0001*           | <0.0001*           | 0.5202             |
| Other neurological disorders                                                  | 66 (2.9)                      | 48 (2.1)         | 114 (3.7)        | 53 (1.7)         | 0.0776             | <0.0001*           | 0.0915             |
| Peripheral vascular disorder                                                  | 60 (2.6)                      | 44 (1.9)         | 114 (3.7)        | 36 (1.2)         | 0.0917             | <0.0001*           | 0.0244             |
| Neurodevelopmental disorders                                                  | 44 (1.9)                      | 22 (1.0)         | 52 (1.7)         | 39 (1.3)         | 0.0052             | 0.1536             | 0.5424             |
| Bipolar and related disorders                                                 | 42 (1.8)                      | 20 (0.9)         | 73 (2.4)         | 29 (0.9)         | 0.0045             | <0.0001*           | 0.1699             |
| Liver disease                                                                 | 34 (1.5)                      | 19 (0.8)         | 78 (2.5)         | 23 (0.8)         | 0.0394             | <0.0001*           | 0.0072             |
| Weight loss                                                                   | 35 (1.5)                      | 18 (0.8)         | 57 (1.9)         | 23 (0.8)         | 0.0195             | <0.0001*           | 0.3538             |
| Alcohol abuse                                                                 | 25 (1.1)                      | 13 (0.6)         | 34 (1.1)         | 13 (0.4)         | 0.0516             | 0.0022             | 0.9487             |
| Congestive heart failure                                                      | 23 (1.0)                      | 22 (1.0)         | 89 (2.9)         | 15 (0.5)         | 0.8815             | <0.0001*           | <0.0001*           |
| Medication-induced movement disorders and other adverse effects of medication | 22 (1.0)                      | 12 (0.5)         | 24 (0.8)         | 18 (0.6)         | 0.0863             | 0.3545             | 0.4877             |
| Elimination disorders                                                         | 21 (0.9)                      | 12 (0.5)         | 32 (1.0)         | 6 (0.2)          | 0.1172             | <0.0001*           | 0.6400             |
| Drug abuse                                                                    | 21 (0.9)                      | 8 (0.3)          | 48 (1.6)         | 12 (0.4)         | 0.0158             | <0.0001*           | 0.0369             |
| Coagulation deficiency                                                        | 20 (0.9)                      | 13 (0.6)         | 42 (1.4)         | 19 (0.6)         | 0.2230             | 0.0028             | 0.0920             |
| Blood loss anemia                                                             | 18 (0.8)                      | 14 (0.6)         | 33 (1.1)         | 12 (0.4)         | 0.4652             | 0.0017             | 0.2773             |
| Pulmonary circulation disorder                                                | 16 (0.7)                      | 13 (0.6)         | 35 (1.1)         | 5 (0.2)          | 0.5775             | <0.0001*           | 0.0979             |
| Neurocognitive disorders                                                      | 15 (0.7)                      | 9 (0.4)          | 41 (1.3)         | 17 (0.6)         | 0.2207             | 0.0016             | 0.0150             |
| Schizophrenia spectrum and other psychotic disorders                          | 15 (0.7)                      | 6 (0.3)          | 21 (0.7)         | 13 (0.4)         | 0.0495             | 0.1701             | 0.8917             |
| Obsessive-compulsive and related disorders                                    | 11 (0.5)                      | 11 (0.5)         | 23 (0.8)         | 10 (0.3)         | 1.0000             | 0.0196             | 0.2174             |
| Feeding and eating disorders                                                  | 9 (0.4)                       | 1 (0.0)          | 12 (0.4)         | 10 (0.3)         | 0.0114             | 0.6698             | 0.9947             |
| Other mental disorders                                                        | 7 (0.3)                       | 6 (0.3)          | 10 (0.3)         | 10 (0.3)         | 0.7815             | 1.0000             | 0.8932             |
| Paralysis                                                                     | 6 (0.3)                       | 5 (0.2)          | 22 (0.7)         | 7 (0.2)          | 0.7630             | 0.0053             | 0.0220             |
| HIV and AIDS                                                                  | 5 (0.2)                       | 2 (0.1)          | 17 (0.6)         | 0 (0.0)          | 0.2568             | -                  | 0.0567             |
| Sexual dysfunctions                                                           | 5 (0.2)                       | 6 (0.3)          | 15 (0.5)         | 11 (0.4)         | 0.7630             | 0.4328             | 0.1073             |
| Somatic symptom and related disorders                                         | 3 (0.1)                       | 2 (0.1)          | 6 (0.2)          | 2 (0.1)          | 0.6547             | 0.1573             | 0.5662             |
| Personality disorders                                                         | 2 (0.1)                       | 4 (0.2)          | 9 (0.3)          | 10 (0.3)         | 0.4142             | 0.8185             | 0.0987             |
| Dissociative disorders                                                        | 2 (0.1)                       | 0 (0.0)          | 2 (0.1)          | 1 (0.0)          | -                  | 0.5637             | 0.7705             |
| Paraphilic disorders                                                          | 1 (0.0)                       | 0 (0.0)          | 0 (0.0)          | 0 (0.0)          | -                  | -                  | 0.2475             |
| Disruptive, impulse-control, and conduct disorders                            | 0 (0.0)                       | 4 (0.2)          | 5 (0.2)          | 2 (0.1)          | -                  | 0.2568             | 0.0530             |
| Chronic peptic ulcer disease                                                  | 0 (0.0)                       | 0 (0.0)          | 1 (0.0)          | 1 (0.0)          | -                  | 1.0000             | 0.3871             |
| Gender dysphoria                                                              | 0 (0.0)                       | 0 (0.0)          | 1 (0.0)          | 0 (0.0)          | -                  | -                  | 0.3871             |

HS: Hidradenitis suppurativa

\* Significant at the 5% level after Bonferroni correction
